# Supplementary material for: Hit-to-Lead Development of the Chamigrane Endoperoxide Merulin A for the Treatment of African Sleeping Sickness
Source: PLoS One. 2012 Sep 27;7(9):e46172. doi: 10.1371/journal.pone.0046172 (PMC3459870; doi:10.1371/journal.pone.0046172)
Supplement: Table S1 — Tabulated purity of merulin library. Calculated compound purities for compounds 8–30. (XLSX) [file pone.0046172.s003.xlsx]

## Sheet: Sheet1
Compound	LC-purity*	NMR-purity	Average**
1	N/A	>99%
8	N/A	0.95
9	N/A	0.95
10	N/A	0.97
11	N/A	0.96
12	0.97	0.97	0.97
13	0.96	0.98	0.97
14	0.99	0.99	0.99
15	0.97	0.97	0.97
16	0.97	0.97	0.97
17	0.98	0.97	0.97
18	0.98	0.98	0.98
19	0.99	0.96	0.97
20	>99%	0.95	0.97
21	0.97	0.97	0.97
22	0.98	0.98	0.98
23	0.99	0.98	0.98
24	0.99	0.99	0.99
25	0.98	0.98	0.98
26	0.99	0.99	0.99
27	N/A	0.99
28	N/A	0.99
29	N/A	0.98
30	>99%	0.95	0.97
* Purity of compounds with no UV could not be determined by LC.
** When possible. Rounded down.
